# Supplementary material
Source: PubMed Central journal article supplement (PMC3457584)
Supplement: IAI.00656-12_zii999099843so1.pdf [file IAI.00656-12_zii999099843so1.pdf]

# Figure S1

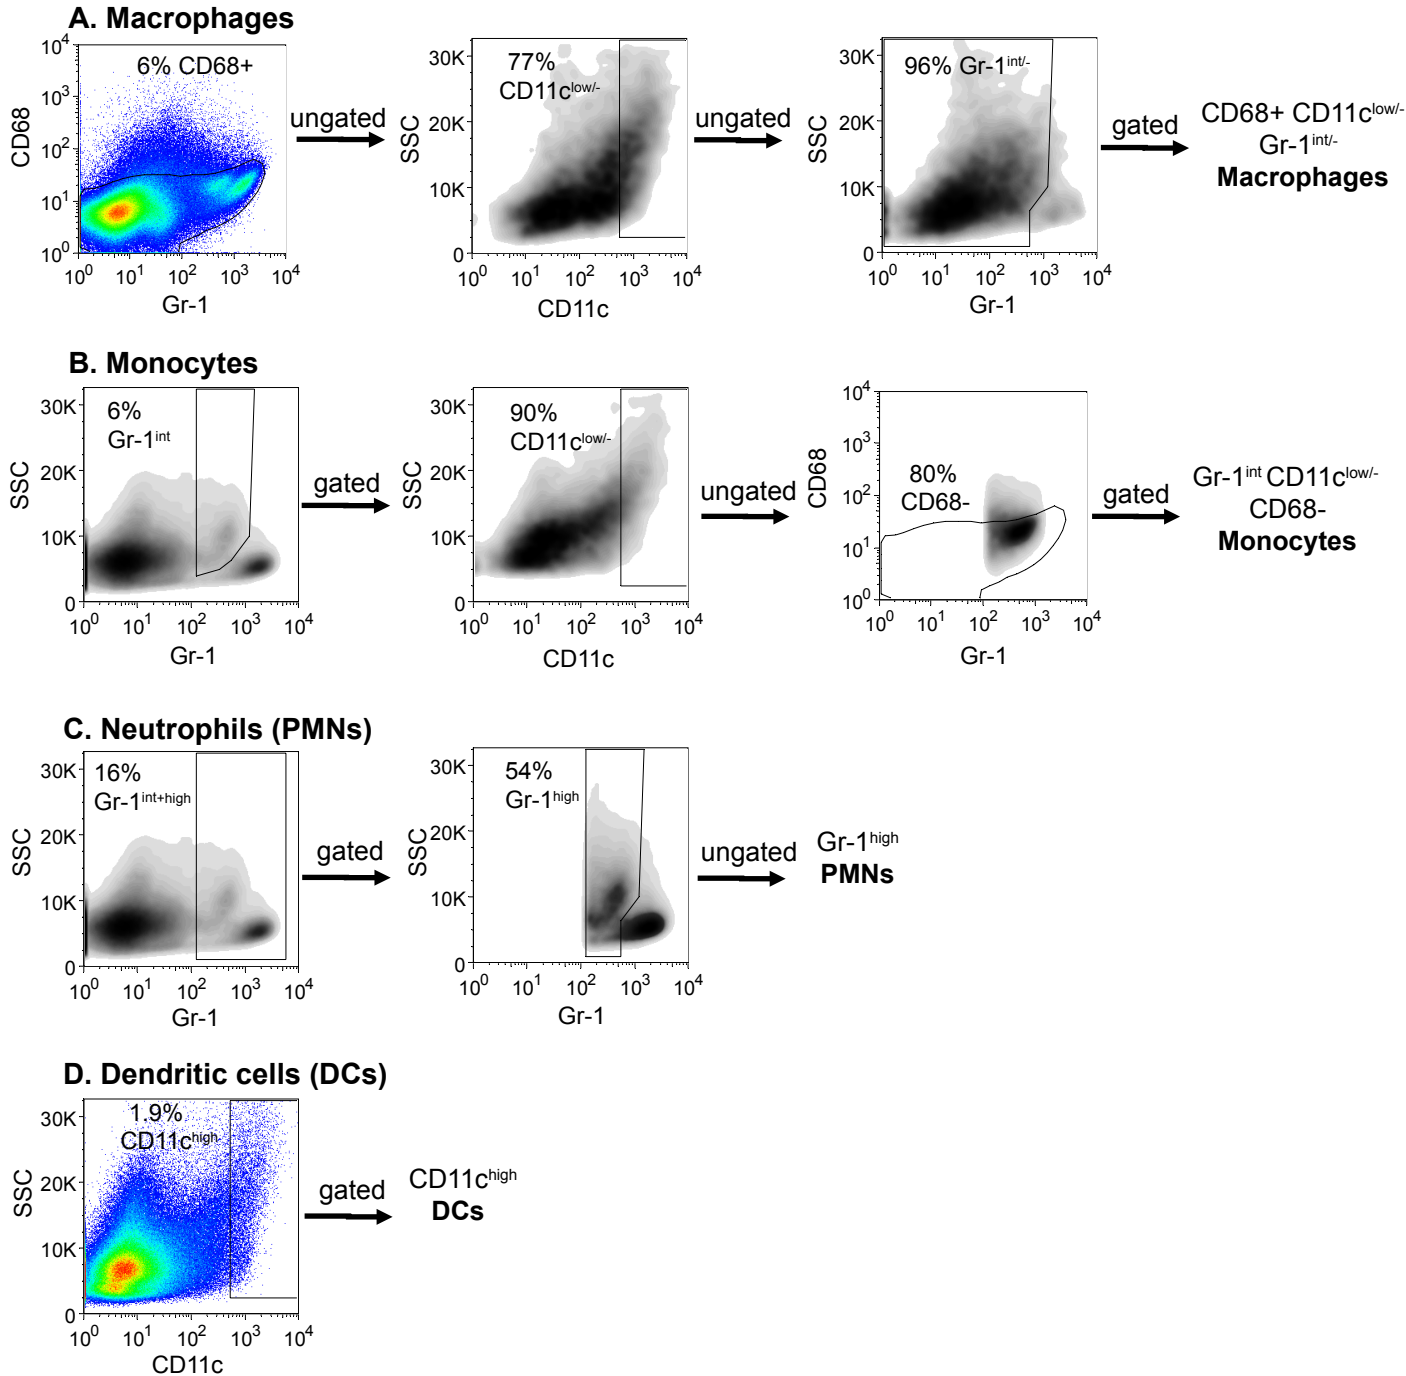

**Figure S1. Gating procedure for macrophages, monocytes, neutrophils and dendritic cells.** Macrophages are defined as CD68<sup>+</sup> CD11c<sup>low/-</sup> Gr-1<sup>int/-</sup> (A). Monocytes are Gr-1<sup>int</sup> CD11c<sup>low/-</sup> CD68<sup>-</sup> (B). PMNs are Gr-1<sup>high</sup> (C). DCs are CD11c<sup>high</sup> (D).
